# Supplementary material for: Opposing roles of LTB4 and PGE2 in regulating the inflammasome-dependent scorpion venom-induced mortality
Source: PubMed Central journal article supplement (PMC4766425; doi:10.1038/ncomms10760), 2016-02-23
Supplement: ncomms10760-s1.pdf [file ncomms10760-s1.pdf]

Supplementary Information

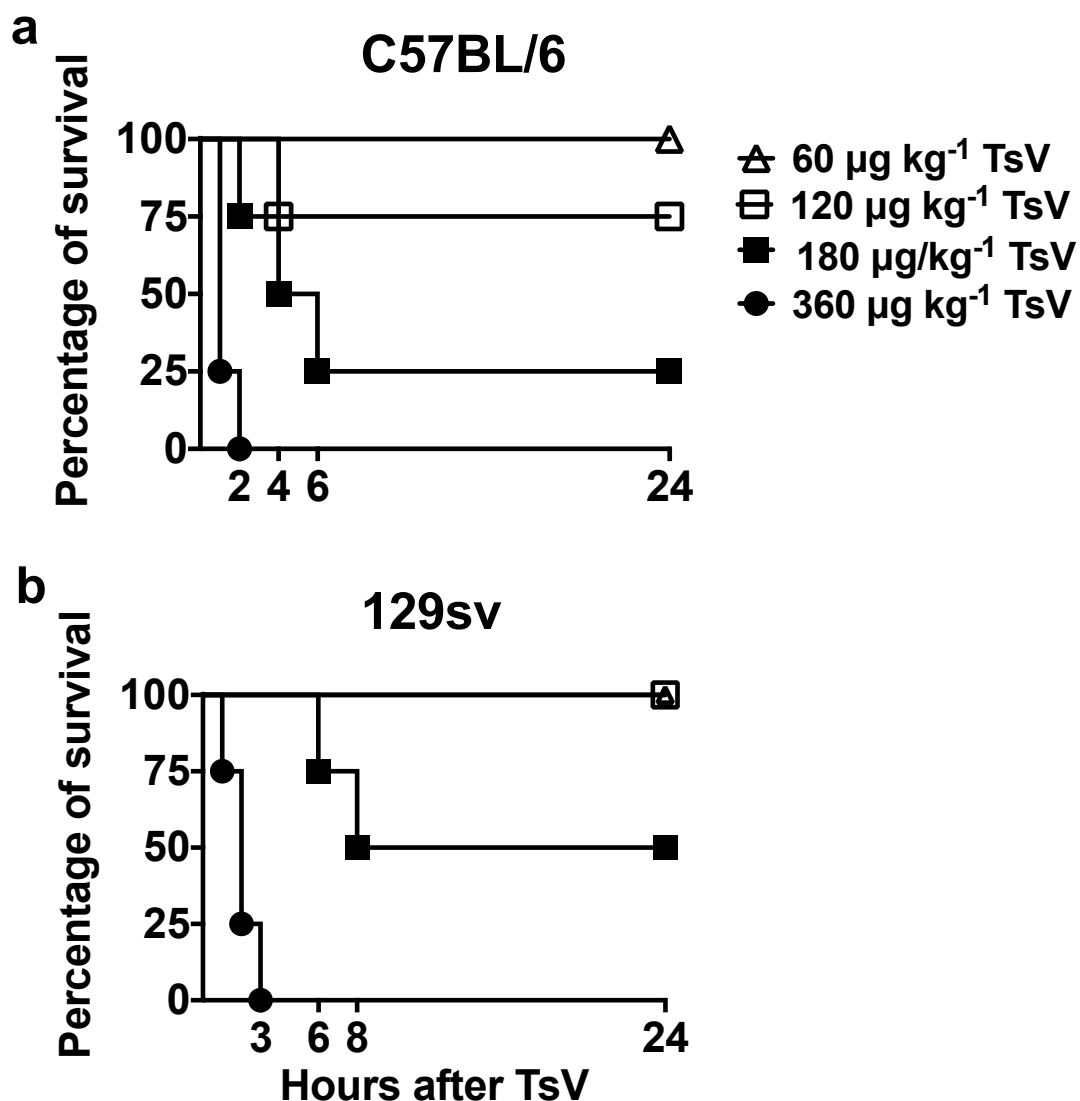

Supplementary Figure 1. Dose-response curves of *T. serrulatus* venom (TsV) in wild-type mice. (a) C57BL/6 and (b) 129sv mice were inoculated with TsV at 60, 120, 180, or 360  $\mu\text{g kg}^{-1}$  and mortality was monitored for 24 h. The dose 120  $\mu\text{g kg}^{-1}$  was considered sublethal, 180  $\mu\text{g kg}^{-1}$  lethal, and 360  $\mu\text{g kg}^{-1}$  a superdose. The dose-response experiment was performed once ( $n = 6$ ).

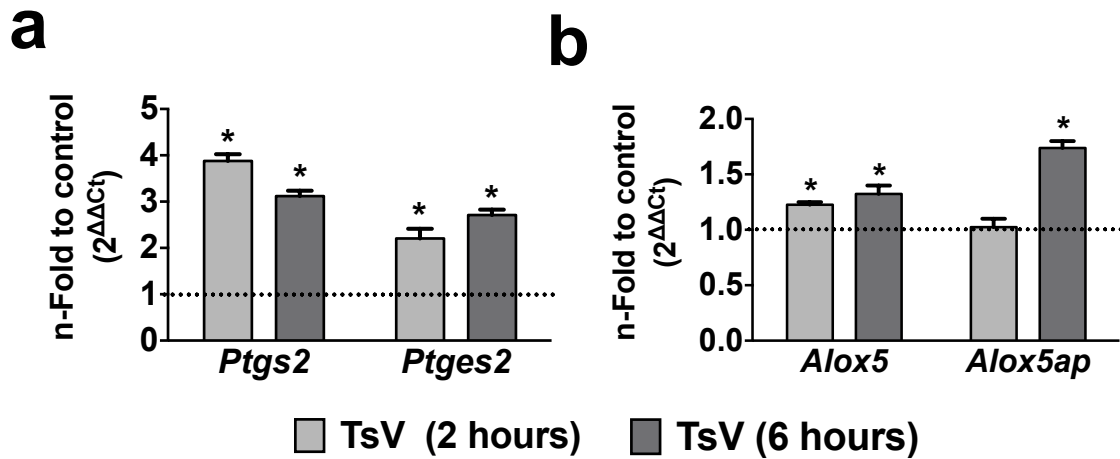

**Supplementary Figure 2. TsV induces the expression of enzymes involved in the eicosanoid metabolism.** Peritoneal macrophages from C57BL/6 mice were harvested to determine the gene expression of (a) *Ptgs2*, *Ptges2*, and (b) *Alox5* and *Alox5ap* by qRT-PCR after TsV-treatment (2 and 6 h) *in vitro*. The results were normalised to the expression levels of the endogenous internal control *Actb* and *Gapdh*. The  $\Delta\Delta C_t$  method was used for the analysis and expressed as n-fold to that of non-TsV stimulated macrophages. The results are presented as the fold-change measured from 2 independent experiments. Significant differences ( $P < 0.05$ ) are marked with symbols and the error bars denote s.d. \*Medium *versus* TsV, according to one-way analysis of variance (ANOVA) with Bonferroni's post-test.

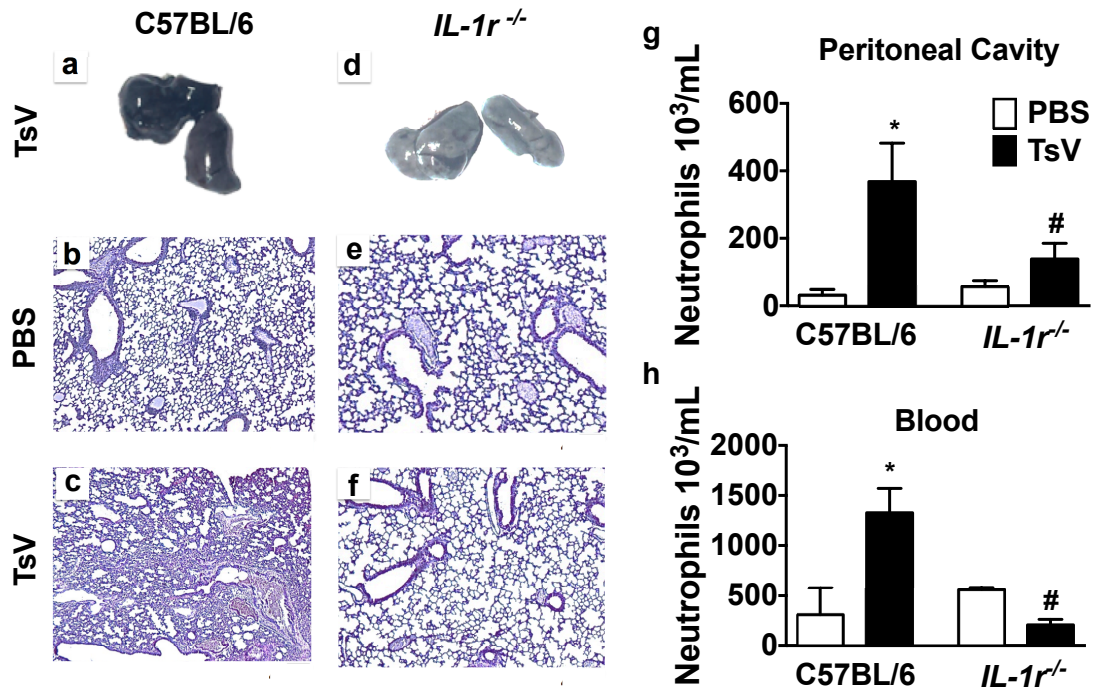

**Supplementary Figure 3. *T. serrulatus* venom (TsV)-induced increase in the number of peritoneal and circulating neutrophils and lung inflammation are dependent on IL-1R signalling.** (a-f) C57BL/6 (WT) mice and *IL-1r<sup>-/-</sup>* mice were inoculated i.p. with TsV (180  $\mu\text{g kg}^{-1}$ ) or PBS. (b,c,e,f) After 4 h, the mice were euthanised and the lungs were excised and prepared for staining with haematoxylin and eosin (H&E) for histological analysis ( $n = 3$ ). Scale bars, 100  $\mu\text{m}$ . (a,d) Additional three animals from each strain were inoculated intravenously with 200  $\mu\text{L}$  Evans blue (1% solution) 60 min before euthanasia, for macroscopic visualisation of lung oedema. In other experiment, C57BL/6 (WT) mice and *IL-1r<sup>-/-</sup>* mice were inoculated i.p. with TsV (120  $\mu\text{g kg}^{-1}$ ) or PBS, and 4 h later, neutrophils in (g) a lavage fluid from the peritoneal cavity and in (h) blood samples were counted. Significant differences ( $P < 0.05$ ) are marked with various symbols: \*PBS versus TsV and #C57BL/6+TSV versus *IL-1r<sup>-/-</sup>*+TSV, according to one-way analysis of variance (ANOVA) with Bonferroni's post-test (g,h). The data shown represent mean  $\pm$  s.e.m. of one experiment on six mice.

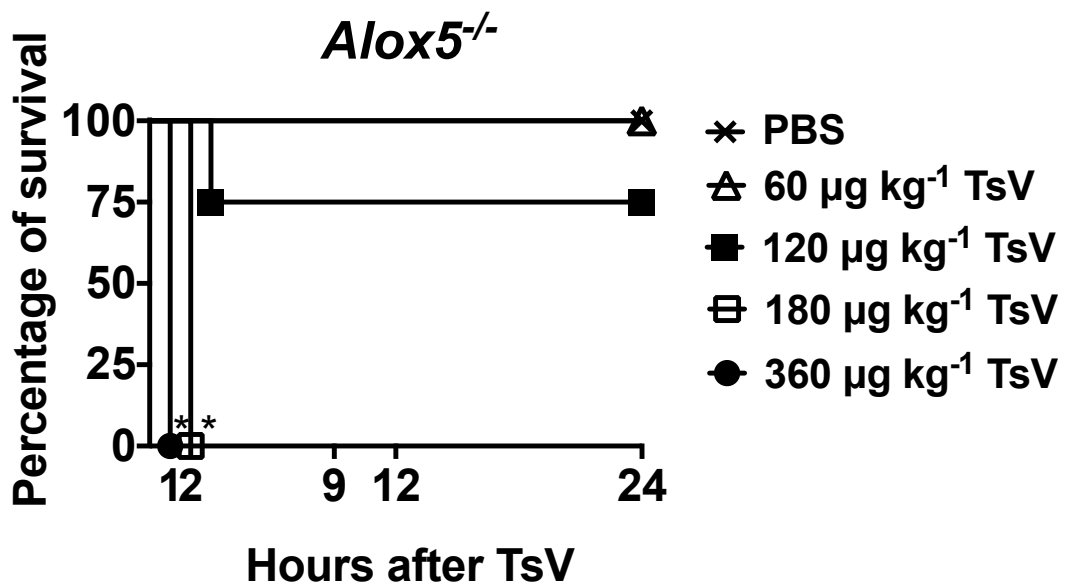

Supplementary Figure 4. Dose-response curves of *T. serrulatus* venom (TsV) in *Alox5<sup>-/-</sup>* mice. *Alox5<sup>-/-</sup>* mice were inoculated with TsV at 60, 120, 180, or 360 µg kg<sup>-1</sup> or PBS and mortality was monitored for 24 h. The dose-response experiment was performed once ( $n = 6$ ).  $P < 0.05$ , according to log-rank test. \* PBS *versus* TsV.

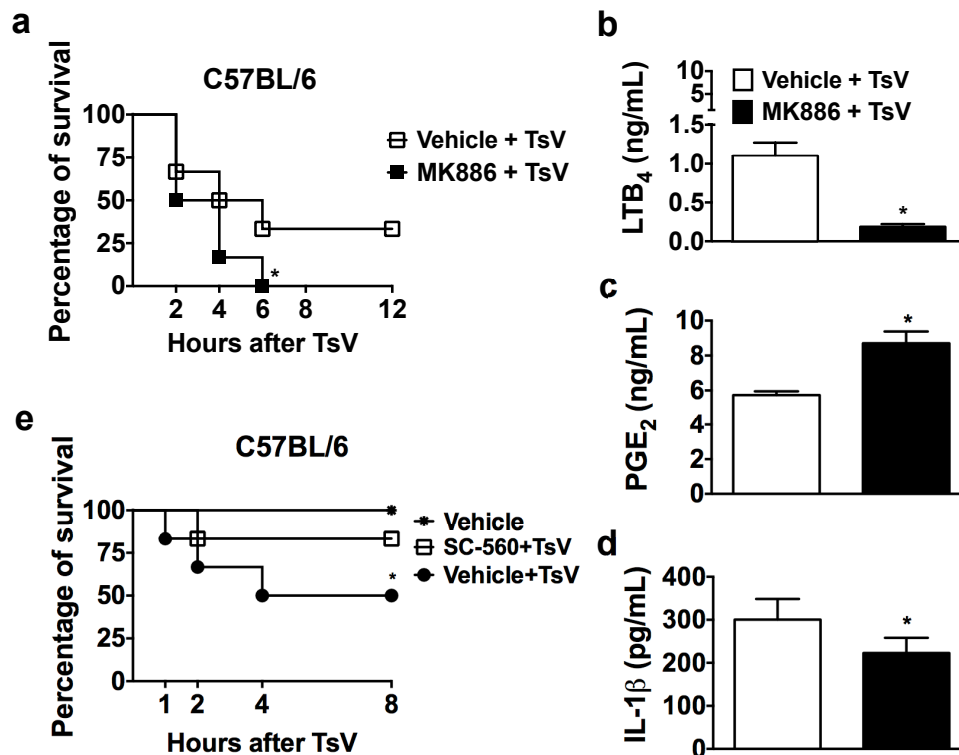

**Supplementary Figure 5. Pharmacological inhibition of the 5-LO pathway increases, but COX1 inhibition partially decreases mortality of wild-type mice inoculated with a lethal dose of *T. serrulatus* venom (TsV).** (a-d) C57BL/6 wild-type mice were treated or not with MK886 (5 mg kg<sup>-1</sup> i.p. in 200 μL of a 1% alcohol solution) or (e) SC-560 (3 mg kg<sup>-1</sup> i.p. in 200 μL of PBS) or vehicle as described in *Methods* and were inoculated with a lethal dose of TsV (180 μg kg<sup>-1</sup>). (a,e) Mortality was monitored for 8 or 12 h. Lungs were excised immediately after death or 12 h after the TsV injection for quantification of (b) LTB<sub>4</sub>, (c) PGE<sub>2</sub>, and (d) IL-1β by an enzyme-linked immunoassay (EIA) or ELISA. The asterisks mark significant differences ( $P < 0.05$ ): (a-d) \*Vehicle+TsV versus MK886+TsV or (e) Vehicle versus Vehicle+TsV. (a,e) Survival was analysed by the log-rank test and (b) differences between means ± s.d. of concentrations of the mediators were evaluated by means of Student's *t* test. The data shown correspond to one experiment with six mice.

| a | Group                                                   | Weight of mice (g)<br>(mean ± SEM) | Weight of lung (g)<br>(mean ± SEM) | Lung weight/Mice<br>(weight) |
|---|---------------------------------------------------------|------------------------------------|------------------------------------|------------------------------|
|   | PBS<br>(C57BL/6)                                        | 19.77 ± 0.389                      | 0.123 ± 0.003                      | 0.613 ± 0.015                |
|   | TsV<br>(C57BL/6)                                        | 19.84 ± 0.785                      | 0.200 ± 0.004 <sup>*</sup>         | 1.005 ± 0.048 <sup>*</sup>   |
|   | PBS<br>( <i>IL-1<math>\beta</math></i> <sup>-/-</sup> ) | 20.59 ± 0.691                      | 0.137 ± 0.005                      | 0.700 ± 0.056                |
|   | TsV<br>( <i>IL-1<math>\beta</math></i> <sup>-/-</sup> ) | 20.94 ± 0.400                      | 0.178 ± 0.004 <sup>##</sup>        | 0.864 ± 0.019 <sup>##</sup>  |

| b | Group                                     | Weight of mice (g)<br>(mean ± SEM) | Weight of lung (g)<br>(mean ± SEM) | Lung weight/Mice<br>(weight) |
|---|-------------------------------------------|------------------------------------|------------------------------------|------------------------------|
|   | PBS<br>(C57BL/6)                          | 19.03 ± 0.850                      | 0.123 ± 0.002                      | 0.652 ± 0.026                |
|   | TsV<br>(C57BL/6)                          | 20.04 ± 0.511                      | 0.263 ± 0.012 <sup>*</sup>         | 1.351 ± 0.101 <sup>*</sup>   |
|   | PBS<br>( <i>Casp1/11</i> <sup>-/-</sup> ) | 19.20 ± 1.711                      | 0.139 ± 0.004                      | 0.666 ± 0.023                |
|   | TsV<br>( <i>Casp1/11</i> <sup>-/-</sup> ) | 19.77 ± 0.55                       | 0.110 ± 0.030 <sup>#</sup>         | 0.575 ± 0.177 <sup>#</sup>   |

| c | Group                                                                  | Weight of mice (g)<br>(mean ± SEM) | Weight of lung (g)<br>(mean ± SEM) | Lung weight/Mice<br>(weight) |
|---|------------------------------------------------------------------------|------------------------------------|------------------------------------|------------------------------|
|   | PBS<br>(129sv mice)                                                    | 20.60 ± 0.507                      | 0.151 ± 0.011                      | 0.734 ± 0.054                |
|   | Vehicle + TsV<br>(129sv mice)                                          | 20.27 ± 0.426                      | 0.177 ± 0.012 <sup>*</sup>         | 0.871 ± 0.052 <sup>*</sup>   |
|   | Indo + TsV<br>(129sv mice)                                             | 20.18 ± 0.727                      | 0.121 ± 0.002 <sup>§</sup>         | 0.607 ± 0.031 <sup>§</sup>   |
|   | PBS<br>( <i>5-lo<math>\alpha</math></i> <sup>-/-</sup> mice)           | 21.08 ± 0.320                      | 0.148 ± 0.012                      | 0.698 ± 0.047                |
|   | Vehicle + TsV<br>( <i>5-lo<math>\alpha</math></i> <sup>-/-</sup> mice) | 20.42 ± 0.699                      | 0.187 ± 0.020 <sup>*</sup>         | 0.974 ± 0.045 <sup>*</sup>   |
|   | Indo + TsV<br>( <i>5-lo<math>\alpha</math></i> <sup>-/-</sup> mice)    | 19.88 ± 0.621                      | 0.154 ± 0.007 <sup>§</sup>         | 0.780 ± 0.042 <sup>§</sup>   |

| d | Group<br>(C57BL/6 mice) | Weight of mice (g)<br>(mean ± SEM) | Weight of lung (g)<br>(mean ± SEM) | Lung Index/Mice<br>(weight) |
|---|-------------------------|------------------------------------|------------------------------------|-----------------------------|
|   | Vehicle + TsV           | 19.77 ± 0.390                      | 0.173 ± 0.006                      | 0.880 ± 0.036               |
|   | MK886 + TsV             | 19.98 ± 0.640                      | 0.124 ± 0.003 <sup>§</sup>         | 0.627 ± 0.033 <sup>§</sup>  |
|   | Indo + TsV              | 20.33 ± 0.479                      | 0.126 ± 0.003 <sup>§</sup>         | 0.620 ± 0.014 <sup>§</sup>  |

| e | Group<br>(C57BL/6 mice) | Weight of mice (g)<br>(mean ± SEM) | Weight of lung (g)<br>(mean ± SEM) | Lung Index/Mice<br>(weight) |
|---|-------------------------|------------------------------------|------------------------------------|-----------------------------|
|   | PBS                     | 19.67 ± 0.338                      | 0.137 ± 0.010                      | 0.701 ± 0.063               |
|   | Vehicle + TsV           | 20.90 ± 0.330                      | 0.191 ± 0.006 <sup>*</sup>         | 0.875 ± 0.057 <sup>*</sup>  |
|   | EP2 + TsV               | 19.82 ± 0.324                      | 0.140 ± 0.004 <sup>#</sup>         | 0.710 ± 0.022 <sup>#</sup>  |
|   | Celecoxib + TsV         | 21.26 ± 0.404                      | 0.141 ± 0.005 <sup>#</sup>         | 0.662 ± 0.020 <sup>#</sup>  |

| f | Group<br>(C57BL/6 mice)                              | Weight of mice (g)<br>(mean ± SEM) | Weight of lung (g)<br>(mean ± SEM) | Lung weight/Mice<br>(weight) |
|---|------------------------------------------------------|------------------------------------|------------------------------------|------------------------------|
|   | TsV (180 $\mu$ g kg <sup>-1</sup> )<br>+ Vehicle     | 20.30 ± 0.435                      | 0.176 ± 0.005                      | 0.870 ± 0.035                |
|   | TsV (180 $\mu$ g kg <sup>-1</sup> )<br>+ Indo 15 min | 20.37 ± 0.776                      | 0.136 ± 0.002 <sup>§</sup>         | 0.673 ± 0.029 <sup>§</sup>   |
|   | TsV (180 $\mu$ g kg <sup>-1</sup> )<br>+ Indo 30 min | 19.80 ± 0.315                      | 0.137 ± 0.005 <sup>§</sup>         | 0.694 ± 0.034 <sup>§</sup>   |
|   | TsV (360 $\mu$ g kg <sup>-1</sup> )<br>+ Vehicle     | 20.62 ± 0.637                      | 0.290 ± 0.004                      | 1.415 ± 0.064                |
|   | TsV (360 $\mu$ g kg <sup>-1</sup> )<br>+ Indo 15 min | 20.08 ± 0.350                      | 0.150 ± 0.004 <sup>§</sup>         | 0.746 ± 0.026 <sup>§</sup>   |
|   | TsV (360 $\mu$ g kg <sup>-1</sup> )<br>+ Indo 30 min | 20.62 ± 0.453                      | 0.141 ± 0.004 <sup>§</sup>         | 0.685 ± 0.016 <sup>§</sup>   |

**Supplementary Table 1. The lung/body weight index.** The mice were weighed immediately before the injection of *T. serrulatus* venom (TsV). Immediately after death or at the end of the observation period, which was never more than 24 h, the entire lungs were weighed. For calculation of the index, lung weight was divided by body weight and the resulting number was multiplied by 100. Significant differences ( $P < 0.05$ ) are marked with various symbols. The data are presented as mean  $\pm$  s.d. \*PBS versus TsV, #differences between strains, and §treated versus untreated mice, according to one-way analysis of variance (ANOVA) with Bonferroni's post-test ( $n = 6$ ).

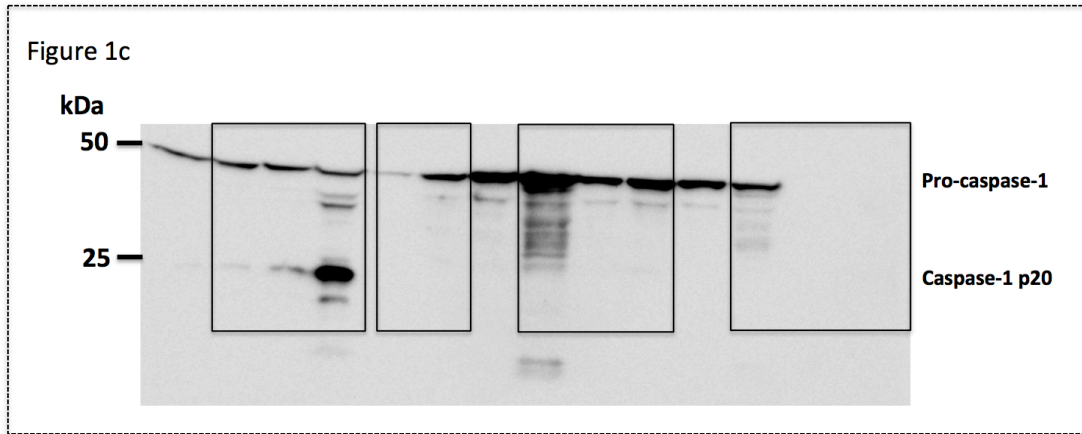

**Supplementary Figure 6. Full immunoblot of main figure presented in this study.**

**Supplementary Table 2. List of the primers used in this study.**

| <b>Gene</b>    | <b>Sequence (5' to 3')</b>                                                                                                  |
|----------------|-----------------------------------------------------------------------------------------------------------------------------|
| <i>Ptgs2</i>   | Primer 1: GCGCAGTTTATGTTGTCTGTC<br>Primer 2: CAAGACAGATCATAAGCGAGGA<br>Probe: 6-FAM/TGATTTAAG/ZEN/TCCACTCCATGGCCCAG/3IABkFQ |
| <i>Ptgs2</i>   | Primer 1: GGCCTAATGATGACAGAGGAG<br>Primer 2: CCCGTGAGAAGGACTGAGAT<br>Probe: 6-FAM/AGGAAGGAG/ZEN/ACAGCTTGCAACAGC/3IABkFQ     |
| <i>Ptger1</i>  | Primer 1: ATCCGCTAGGCTCAGGTTA<br>Primer 2: AGTAGCTGGAGCAGGCA<br>Probe: 6-FAM/TGAGCAGCA/ZEN/CTGGCCCTCTTG/3IABkFQ             |
| <i>Ptger2</i>  | Primer 1: GAGGTTTCATCCATGTAGGCA<br>Primer 2: AGAGGAGAGAGGACTTCGATG<br>Probe: 6-FAM/ACCATCACC/ZEN/TTCGCCATATGCTCC/3IABkFQ    |
| <i>Ptger3</i>  | Primer 1: CCTTCTCCTTTCCCATCTGTG<br>Primer 2: GTGTGCTGTCCGTCTGTT<br>Probe: 6-FAM/TGCATTGCT/ZEN/CAACCGACATCTGATTGA/3IABkFQ    |
| <i>Ptger4</i>  | Primer 1: CTGATGTCTTTCACCACGTTTG<br>Primer 2: CATCTTACTCATCGCCACCTC<br>Probe: 6-FAM/TGCTCATCT/ZEN/GCTCCATTCCGCTC/3IABkFQ    |
| <i>Alox5</i>   | Primer 1: CCAGTCGTACTTTGAATCCGT<br>Primer 2: CCATCTGCCTGCTATATAAGAACC<br>Probe: 6-FAM/CCATTGCCA/ZEN/TCCAGCTCAACCAAA/3IABkFQ |
| <i>Alox5ap</i> | Primer 1: CTCCCAGATAGCCGAACAAAG<br>Primer 2: CAGAACTGCGTAGATGCGTA<br>Probe: 6-FAM/TGCCTCACA/ZEN/AACAGGTACATCAGTCC/3IABkFQ   |
| <i>Ltb4r1</i>  | Primer 1: CATGCCACCAGGAGAAGAAG<br>Primer 2: GGCCTAAGACAGATTCAAGGA<br>Probe: 6-FAM/CAGCCATCA/ZEN/AAAGGACAGGGTTTCC/3IABkFQ    |
| <i>Ltb4r2</i>  | Primer 1: GCTCAGTAGTGTCTCATTCCC<br>Primer 2: GGCTTCACCTGTACCTT<br>Probe: 6-FAM/CCCCCAATG/ZEN/CTGTTCTCTCCC/3IABkFQ           |
| <i>Gapdh</i>   | Primer 1: GTGGAGTCATACTGGAACATGTAG<br>Primer 2: AATGGTGAAGGTCGGTGTG<br>Probe: HEX/TGCAAATGG/ZEN/CAGCCCTGGTG/3IABkFQ         |
| <i>Actb</i>    | Primer 1: GTACGACCAGAGGCATACAG<br>Primer 2: CTGAACCCTAAGGCCAACC<br>Probe: HEX/AGACCTTCA/ZEN/ACACCCCAGCCATG/3IABkFQ          |
